# Supplementary material for: The sST2 level is an independent influencing factor associated with atrial fibrillation in heart failure patients: a case-control study
Source: PubMed Central journal article supplement — J Thorac Dis. 2022 May;14(5):1578–87. doi: 10.21037/jtd-22-470 (PMC9186244; doi:10.21037/jtd-22-470), 2022-05
Supplement: jtd-14-05-1578-dss.pdf [file jtd-14-05-1578-dss.pdf]

## Data Sharing Statement

|                     |                                                                                                                                                    |                                                                                                                  |
|---------------------|----------------------------------------------------------------------------------------------------------------------------------------------------|------------------------------------------------------------------------------------------------------------------|
| <b>Article Info</b> | <a href="https://dx.doi.org/10.21037/jtd-22-470">https://dx.doi.org/10.21037/jtd-22-470</a>                                                        |                                                                                                                  |
| <b>Item</b>         | <b>Question</b>                                                                                                                                    | <b>Authors' Response<br/>(place "-" if not applicable)</b>                                                       |
| 1                   | Would you like to share data collected for your study to others?                                                                                   | Yes.                                                                                                             |
| 2                   | If not, would you like to share the reason for your decision?                                                                                      | -                                                                                                                |
| 3                   | What data in particular will be shared?                                                                                                            | The clinicopathological data of patients enrolled in this study.                                                 |
| 4                   | Any other documents will be share? Such as study protocol, statistical analysis plan, informed consent form, clinical study report, analytic code. | Study protocol, statistical analysis plan will be shared.                                                        |
| 5                   | When will data availability begin?                                                                                                                 | From the publication data.                                                                                       |
| 6                   | When will data availability end?                                                                                                                   | One year after the publication data.                                                                             |
| 7                   | To whom will you share the data?                                                                                                                   | Researchers in the same field.                                                                                   |
| 8                   | For what type of analysis or purpose?                                                                                                              | For similar research work.                                                                                       |
| 9                   | How or where can the data/documents be obtained?                                                                                                   | Email sent to the correspondence author as follows: lizhizhongazyy@163.com                                       |
| 10                  | Any other restrictions?                                                                                                                            | We may balance the potential benefits and risks for each request and then provide the data that could be shared. |
